# Supplementary material for: Effect of a tailored multidimensional intervention on the care burden among family caregivers of stroke survivors: a randomised controlled trial
Source: HighWire-hosted journal article supplement (doi:10.1136/bmjopen-2021-049741), 2022-02-01
Supplement: bmjopen-2021-049741supp001_data_supplement.pdf [file bmjopen-2021-049741supp001_data_supplement.pdf]

**Example of nurses' implementation record format**

| Date | Intervention schedule      | Duration   | Intervention                                                                                                                                                                                                                                                                                                                                                                                                                                                                                                                  | Status |          | Remarks |
|------|----------------------------|------------|-------------------------------------------------------------------------------------------------------------------------------------------------------------------------------------------------------------------------------------------------------------------------------------------------------------------------------------------------------------------------------------------------------------------------------------------------------------------------------------------------------------------------------|--------|----------|---------|
|      |                            |            |                                                                                                                                                                                                                                                                                                                                                                                                                                                                                                                               | Done   | Not done |         |
|      | 1 <sup>st</sup> home visit | 5 minutes  | Introduction                                                                                                                                                                                                                                                                                                                                                                                                                                                                                                                  |        |          |         |
|      |                            | 30 minutes | Explaining stroke to the caregiver and how stroke affects the stroke survivor physically, psychologically, cognitively, and emotionally.                                                                                                                                                                                                                                                                                                                                                                                      |        |          |         |
|      |                            | 20 minutes | Explaining to the caregiver the action, side effects, and warning signs of the anticoagulants and cholesterol-lowering medications.<br><br>Teach caregiver the proper way of administration of medications.<br><br>Instruct the caregiver to check the needed laboratory investigations periodically.                                                                                                                                                                                                                         |        |          |         |
|      |                            | 50 minutes | Teaching the caregiver about the most common complications after stroke, such as shoulder pain, deep venous thrombosis, pressure ulcers, and urinary tract infection.<br><br>Providing the caregiver with information on how to prevent and manage complications. <ul style="list-style-type: none"> <li>○ Encouraging mobility and independence</li> <li>○ Maintain skin integrity</li> <li>○ Handling and support the affected limbs during the positioning and transfer</li> <li>○ Bladder and bowel management</li> </ul> |        |          |         |

|  |                                   |            |                                                                                                                                                                                                                                                                                                                                                                                                   |  |  |  |
|--|-----------------------------------|------------|---------------------------------------------------------------------------------------------------------------------------------------------------------------------------------------------------------------------------------------------------------------------------------------------------------------------------------------------------------------------------------------------------|--|--|--|
|  |                                   | 10 minutes | Advising the caregiver to check the vital data of the survivor periodically.                                                                                                                                                                                                                                                                                                                      |  |  |  |
|  |                                   |            | Instructing the caregivers to record any new changes/abnormalities and to report them to the assigned nurse.                                                                                                                                                                                                                                                                                      |  |  |  |
|  |                                   | 5 minutes  | Summary                                                                                                                                                                                                                                                                                                                                                                                           |  |  |  |
|  | 1 <sup>st</sup> telephone contact | 10 minutes | Introduction<br>Asking the caregiver about the survivor's responses to the rehabilitation                                                                                                                                                                                                                                                                                                         |  |  |  |
|  |                                   | 10 minutes | Based on the monthly meeting of the interdisciplinary team, feedback and recommendations will be provided to the caregiver.                                                                                                                                                                                                                                                                       |  |  |  |
|  |                                   | 20 minutes | Teaching the caregiver effective communication moments such as: <ul style="list-style-type: none"> <li>○ To be a good listener.</li> <li>○ To be sure you get the information related to your questions.</li> <li>○ To educate yourself about your relative's condition.</li> <li>○ To keep a notebook as a reminder.</li> </ul>                                                                  |  |  |  |
|  | 2 <sup>nd</sup> home visit        | 5 minutes  | Introduction                                                                                                                                                                                                                                                                                                                                                                                      |  |  |  |
|  |                                   | 60 minutes | The assigned nurse teaches the family caregivers the principles of rehabilitation: <ul style="list-style-type: none"> <li>- Understand movement problems and spasticity</li> <li>- Ensure the safety of the stroke survivor</li> <li>- Keep the stroke survivor's motivation</li> <li>- Encourage Mobility and Independence</li> <li>- Modify the environment surrounding the survivor</li> </ul> |  |  |  |

|  |                                   |            |                                                                                                                                                                                                                                                                                                                                                                                                                                               |  |  |  |
|--|-----------------------------------|------------|-----------------------------------------------------------------------------------------------------------------------------------------------------------------------------------------------------------------------------------------------------------------------------------------------------------------------------------------------------------------------------------------------------------------------------------------------|--|--|--|
|  |                                   |            | <ul style="list-style-type: none"> <li>- Encourage the stroke survivor to use assistive and adaptive devices</li> <li>- Set a schedule of rehabilitation</li> </ul>                                                                                                                                                                                                                                                                           |  |  |  |
|  |                                   | 40 minutes | The assigned nurse trains the caregiver about the rehabilitation procedures: <ul style="list-style-type: none"> <li>- Active and passive exercises</li> <li>- Stroke specific exercises</li> </ul>                                                                                                                                                                                                                                            |  |  |  |
|  |                                   | 10 minutes | Assessment of the survivor's responses to the rehabilitation                                                                                                                                                                                                                                                                                                                                                                                  |  |  |  |
|  |                                   | 5 minutes  | Summary                                                                                                                                                                                                                                                                                                                                                                                                                                       |  |  |  |
|  | 2 <sup>nd</sup> telephone contact | 10 minutes | Introduction<br>Asking the caregiver about the survivor's responses to the rehabilitation                                                                                                                                                                                                                                                                                                                                                     |  |  |  |
|  |                                   | 10 minutes | Based on the monthly meeting of the interdisciplinary team, feedback and recommendations will be provided to the caregiver.                                                                                                                                                                                                                                                                                                                   |  |  |  |
|  |                                   | 20 minutes | Teaching the caregiver that keeping open communication with the stroke survivor and empathy are the golden rules to manage the survivor's emotions and behaviors.<br><br>Train the family caregiver to motivate the survivor through the following principles: <ul style="list-style-type: none"> <li>o Accept that reality that you've had a stroke</li> <li>o Think positively.</li> <li>o Seeking support and staying sociable.</li> </ul> |  |  |  |
|  | 3 <sup>rd</sup> home visit        | 5 minutes  | Introduction                                                                                                                                                                                                                                                                                                                                                                                                                                  |  |  |  |
|  |                                   | 40 minutes | The assigned nurse trains the caregiver about the rehabilitation procedures: <ul style="list-style-type: none"> <li>- Swallowing exercises and managing swallowing difficulties</li> </ul>                                                                                                                                                                                                                                                    |  |  |  |

|  |                                   |            |                                                                                                                                                                                                                                                                                                                                                                                                                                                                                                                                                                                                                                                                                            |  |  |  |
|--|-----------------------------------|------------|--------------------------------------------------------------------------------------------------------------------------------------------------------------------------------------------------------------------------------------------------------------------------------------------------------------------------------------------------------------------------------------------------------------------------------------------------------------------------------------------------------------------------------------------------------------------------------------------------------------------------------------------------------------------------------------------|--|--|--|
|  |                                   |            | - Simple alternatives to overcome the aphasia, hearing difficulty and communication disorders                                                                                                                                                                                                                                                                                                                                                                                                                                                                                                                                                                                              |  |  |  |
|  |                                   | 10 minutes | Assessment of the survivor's responses to the rehabilitation                                                                                                                                                                                                                                                                                                                                                                                                                                                                                                                                                                                                                               |  |  |  |
|  |                                   | 60 minutes | <p>Providing home visit nursing to support and train the caregivers in the caregiving activities such as transferring, positioning, bathing and toileting, oral hygiene, dressing, and feeding.</p> <p>Teaching the caregiver regarding the principle "Your safety first" and other basic principles of caring for the dependent stroke survivor.</p> <p>Setting a schedule of daily/weekly/monthly activities (mixed of the personal life of the caregiver and caring role).</p> <p>Teaching the caregivers to keep the principle "you cannot do alone" and is a must seek instrumental support.</p> <p>Guiding the caregivers to private resources such as respite care and daycare.</p> |  |  |  |
|  |                                   | 5 minutes  | Summary                                                                                                                                                                                                                                                                                                                                                                                                                                                                                                                                                                                                                                                                                    |  |  |  |
|  | 3 <sup>rd</sup> telephone contact | 5 minutes  | <p>Introduction</p> <p>Asking the caregiver about the survivor's responses to the rehabilitation</p>                                                                                                                                                                                                                                                                                                                                                                                                                                                                                                                                                                                       |  |  |  |
|  |                                   | 5 minutes  | Based on the monthly meeting of the interdisciplinary team, feedback and recommendations will be provided to the caregiver.                                                                                                                                                                                                                                                                                                                                                                                                                                                                                                                                                                |  |  |  |
|  |                                   | 30 minutes | Educating the caregiver steps against recurrent stroke                                                                                                                                                                                                                                                                                                                                                                                                                                                                                                                                                                                                                                     |  |  |  |

|  |                                   |            |                                                                                                                                                                                                                                                                                                                                                                                                                                                                                                                                                                                                                                                                                                                                                                                                                                                                                                                                                                                                                 |  |  |  |
|--|-----------------------------------|------------|-----------------------------------------------------------------------------------------------------------------------------------------------------------------------------------------------------------------------------------------------------------------------------------------------------------------------------------------------------------------------------------------------------------------------------------------------------------------------------------------------------------------------------------------------------------------------------------------------------------------------------------------------------------------------------------------------------------------------------------------------------------------------------------------------------------------------------------------------------------------------------------------------------------------------------------------------------------------------------------------------------------------|--|--|--|
|  |                                   |            | <ul style="list-style-type: none"> <li>○ Know the risk factors for stroke</li> <li>○ Change lifestyle of the stroke survivor               <ul style="list-style-type: none"> <li>- Encourage the stroke survivor to stop smoking</li> <li>- Watch what the stroke survivor eats.</li> <li>- Maintain a healthy weight for the stroke survivor</li> <li>- Motivate the stroke survivor to be active</li> <li>- Control blood glucose level</li> </ul> </li> <li>○ Review medications               <ul style="list-style-type: none"> <li>- List the medications (insulin, anticoagulant, cholesterol-lowering medications)</li> <li>- Teach the caregiver the medication safety and rights</li> </ul> </li> <li>○ Know the stroke survivor's Numbers               <ul style="list-style-type: none"> <li>- Record and monitor blood pressure, blood glucose and cholesterol level.</li> </ul> </li> <li>○ Reporting to the assigned nurse.</li> <li>○ Remember the warning signs of stroke (FAST).</li> </ul> |  |  |  |
|  | Peer support session              | 10 minutes | Introduction to session                                                                                                                                                                                                                                                                                                                                                                                                                                                                                                                                                                                                                                                                                                                                                                                                                                                                                                                                                                                         |  |  |  |
|  |                                   | 10 minutes | caregivers' self-introduction                                                                                                                                                                                                                                                                                                                                                                                                                                                                                                                                                                                                                                                                                                                                                                                                                                                                                                                                                                                   |  |  |  |
|  |                                   | 60 minutes | Sharing experiences with peers                                                                                                                                                                                                                                                                                                                                                                                                                                                                                                                                                                                                                                                                                                                                                                                                                                                                                                                                                                                  |  |  |  |
|  |                                   | 10 minutes | summary                                                                                                                                                                                                                                                                                                                                                                                                                                                                                                                                                                                                                                                                                                                                                                                                                                                                                                                                                                                                         |  |  |  |
|  | 4 <sup>th</sup> telephone contact | 10 minutes | Introduction<br>Asking the caregiver about the survivor's responses to the rehabilitation                                                                                                                                                                                                                                                                                                                                                                                                                                                                                                                                                                                                                                                                                                                                                                                                                                                                                                                       |  |  |  |
|  |                                   | 10 minutes | Based on the monthly meeting of the interdisciplinary team, feedback and recommendations will be provided to the caregiver.                                                                                                                                                                                                                                                                                                                                                                                                                                                                                                                                                                                                                                                                                                                                                                                                                                                                                     |  |  |  |
|  |                                   | 20 minutes | Training caregivers to maintain effective communication with others.                                                                                                                                                                                                                                                                                                                                                                                                                                                                                                                                                                                                                                                                                                                                                                                                                                                                                                                                            |  |  |  |

|  |                                   |            |                                                                                                                                                                                                                                                                                                                                                                                                                                                                                                                                                                                                                      |  |  |  |
|--|-----------------------------------|------------|----------------------------------------------------------------------------------------------------------------------------------------------------------------------------------------------------------------------------------------------------------------------------------------------------------------------------------------------------------------------------------------------------------------------------------------------------------------------------------------------------------------------------------------------------------------------------------------------------------------------|--|--|--|
|  |                                   |            | <p>Encouraging the caregiver to educate him/herself and the others stroke and its consequences on the survivors.</p> <p>Motivating the caregiver to express feelings with the other significant persons</p> <p>Avoiding deciding alone and learning to make a shared decision with other family members.</p>                                                                                                                                                                                                                                                                                                         |  |  |  |
|  | 5 <sup>th</sup> telephone contact | 10 minutes | <p>Introduction</p> <p>Asking the caregiver about the survivor's responses to the rehabilitation</p>                                                                                                                                                                                                                                                                                                                                                                                                                                                                                                                 |  |  |  |
|  |                                   | 10 minutes | <p>Based on the monthly meeting of the interdisciplinary team, feedback and recommendations will be provided to the caregiver.</p>                                                                                                                                                                                                                                                                                                                                                                                                                                                                                   |  |  |  |
|  |                                   | 20 minutes | <p>Explaining to the caregiver the physical and emotional responses to stress resulting from caregiving</p> <p>Giving clear and honest explanation regarding stroke and its complications</p> <p>Teaching the caregiver stress management strategies</p> <p>Confirming the principles of acceptance</p> <ul style="list-style-type: none"> <li>- Accept the reality of stroke</li> <li>- Accept that you cannot do this alone</li> </ul> <p>Seeking religious and spiritual support.</p> <p>Trying the power of positive thinking.</p> <p>Check your health and do not ignore symptoms of psychological illness.</p> |  |  |  |
|  |                                   | 10 minutes | <p>Introduction</p>                                                                                                                                                                                                                                                                                                                                                                                                                                                                                                                                                                                                  |  |  |  |

|  |                                   |            |                                                                                                                             |  |  |  |
|--|-----------------------------------|------------|-----------------------------------------------------------------------------------------------------------------------------|--|--|--|
|  | 6 <sup>th</sup> telephone contact |            | Asking the caregiver about the survivor's responses to the rehabilitation                                                   |  |  |  |
|  |                                   | 10 minutes | Based on the monthly meeting of the interdisciplinary team, feedback and recommendations will be provided to the caregiver. |  |  |  |
|  |                                   | 20 minutes | Summary and closure of the intervention                                                                                     |  |  |  |
